# Supplementary material for: Synthesis of polymers with densely-grafted oligo(ethylene glycol)s by Pd-initiated polymerization of oxyethylene-containing diazoacetates
Source: Royal Society of Chemistry journal article supplement (doi:10.1039/c5py01378j), 2015-01-01
Supplement: c5py01378j1.pdf [file c5py01378j1.pdf]

*Supporting Information for*

**Synthesis of Polymers with Densely-grafted Oligo(ethylene glycol)s by Pd-initiated  
Polymerization of Oxyethylene-containing Diazoacetates**

Hiroaki Shimomoto,<sup>1</sup> Kohta Shimizu,<sup>1</sup> Chiharu Takeda,<sup>1</sup> Misaki Kikuchi,<sup>1</sup> Tomohiko Kudo,<sup>1</sup> Hiroto Mukai,<sup>1</sup>  
Tomomichi Itoh,<sup>1</sup> Eiji Ihara,<sup>1\*</sup> Naohiro Hoshikawa,<sup>2</sup> Akihiko Koivai,<sup>2</sup> and Naoki Hasegawa<sup>2\*</sup>

<sup>1</sup>Department of Materials Science and Biotechnology, Graduate School of Science and Engineering, Ehime University,  
3 Bunkyo-cho, Matsuyama 790-8577, Japan

Phone & Fax: +81-89-927-8547; E-mail: ihara@ehime-u.ac.jp

<sup>2</sup>Toyota Central R&D Labs., Inc., 41-1 Yokomichi, Nagakute, Aichi 480-1192, Japan

Phone & Fax: +81-561-71-7051, E-mail: e0974@mosk.tytlabs.co.jp

**Contents:**

**Figure S1.** <sup>1</sup>H NMR spectrum of P(OEG<sub>2</sub>D).

**Figure S2.** <sup>1</sup>H NMR spectrum of P(OEG<sub>3</sub>D).

**Figure S3.** <sup>1</sup>H NMR spectrum of P(OEG<sub>4</sub>D).

**Figure S4.** <sup>1</sup>H NMR spectrum of P(OEG<sub>7</sub>D).

**Figure S5.** <sup>1</sup>H NMR spectrum of P(OEG<sub>12</sub>D).

**Figure S6.** Plots of transmittance vs. temperature for aqueous solutions of P(OEG<sub>1</sub>D).

**Figure S7.** Plots of transmittance vs. temperature for aqueous solutions of P(OEG<sub>1</sub>D).

**Figure S8.** Plots of transmittance vs. temperature for aqueous solutions of P(OEG<sub>2</sub>D) and P(OEG<sub>3</sub>D).

**Figure S9.** DSC curves for P(OEG<sub>x</sub>D).

**Figure S10.** DSC curves for P(OEG<sub>x</sub>D)/Li<sup>+</sup> complexes.

**Figure S11.** DSC curves for P(OEG<sub>x</sub>A).

**Figure S12.** DSC curves for P(OEG<sub>x</sub>A)/Li<sup>+</sup> complexes.

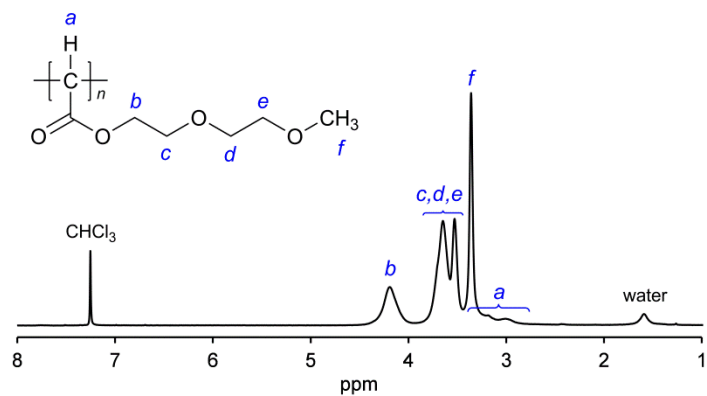

**Figure S1.**  $^1\text{H}$  NMR spectrum of P(OEG<sub>2</sub>D) (Table 1, entry 4) recorded in  $\text{CDCl}_3$ .

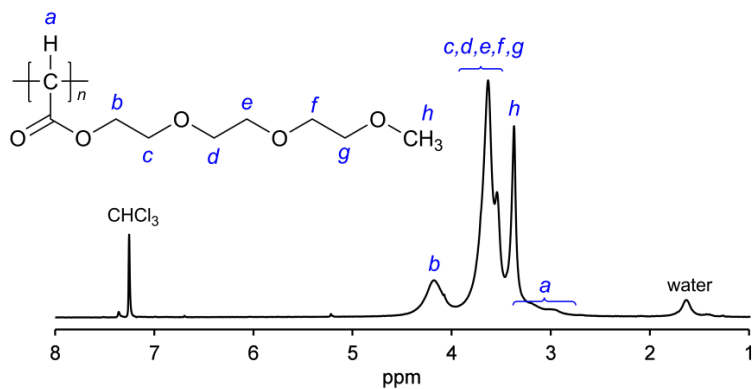

**Figure S2.**  $^1\text{H}$  NMR spectrum of P(OEG<sub>3</sub>D) (Table 1, entry 5) recorded in  $\text{CDCl}_3$ .

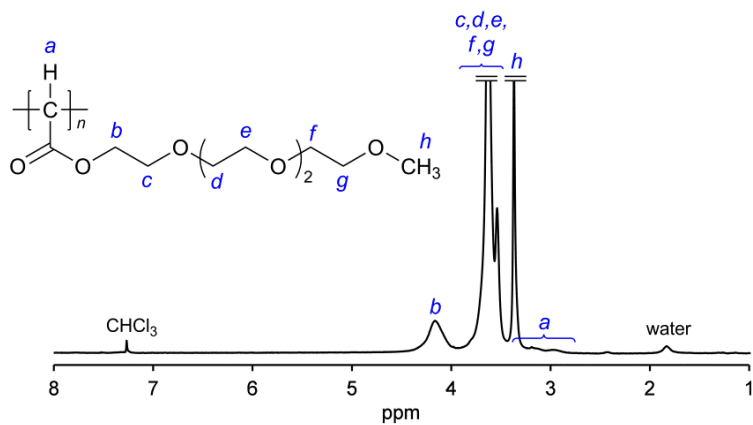

**Figure S3.**  $^1\text{H}$  NMR spectrum of P(OEG<sub>4</sub>D) (Table 1, entry 6) recorded in  $\text{CDCl}_3$ .

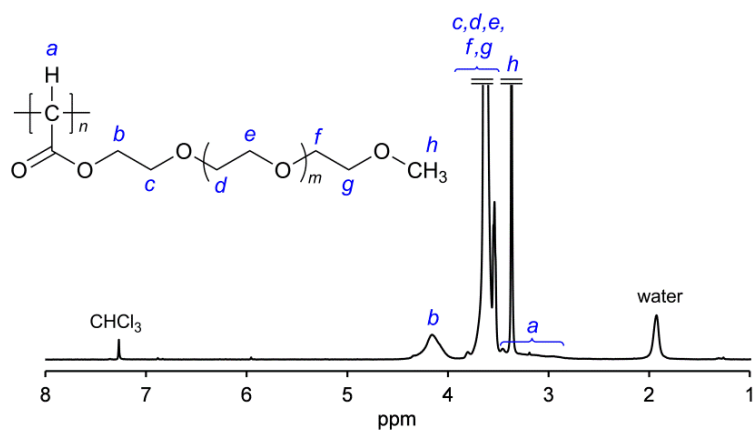

**Figure S4.** <sup>1</sup>H NMR spectrum of P(OEG<sub>7</sub>D) (Table 1, entry 7) recorded in CDCl<sub>3</sub>.

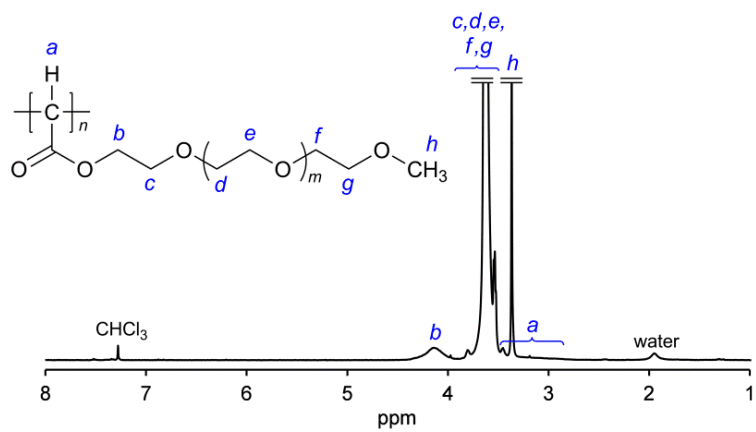

**Figure S5.** <sup>1</sup>H NMR spectrum of P(OEG<sub>12</sub>D) (Table 1, entry 8) recorded in CDCl<sub>3</sub>.

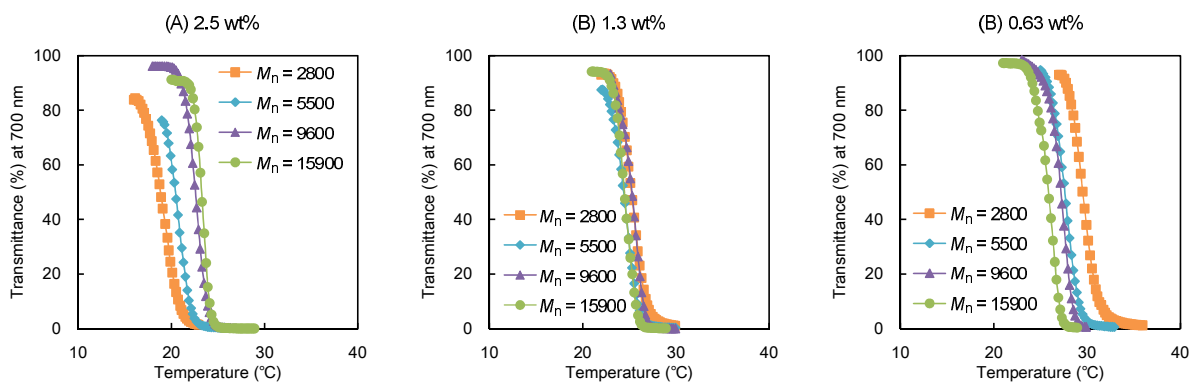

**Figure S6.** Plots of transmittance vs. temperature for aqueous solutions of P(OEG<sub>1</sub>D) during heating.

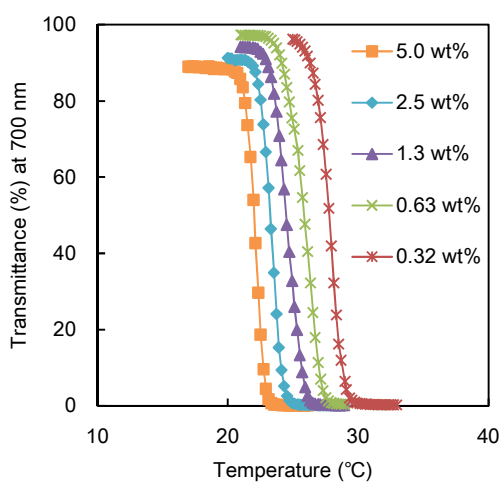

**Figure S7.** Plots of transmittance vs. temperature for aqueous solutions of P(OEG<sub>1</sub>D) ( $M_n = 9600$ ,  $M_w/M_n = 1.13$ ) during heating.

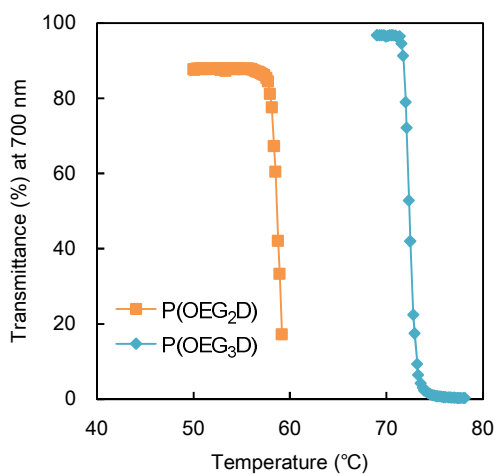

**Figure S8.** Plots of transmittance vs. temperature for aqueous solutions of P(OEG<sub>2</sub>D) ( $M_n = 12200$ ,  $M_w/M_n = 1.15$ ) and P(OEG<sub>3</sub>D) ( $M_n = 14500$ ,  $M_w/M_n = 1.13$ ) during heating.

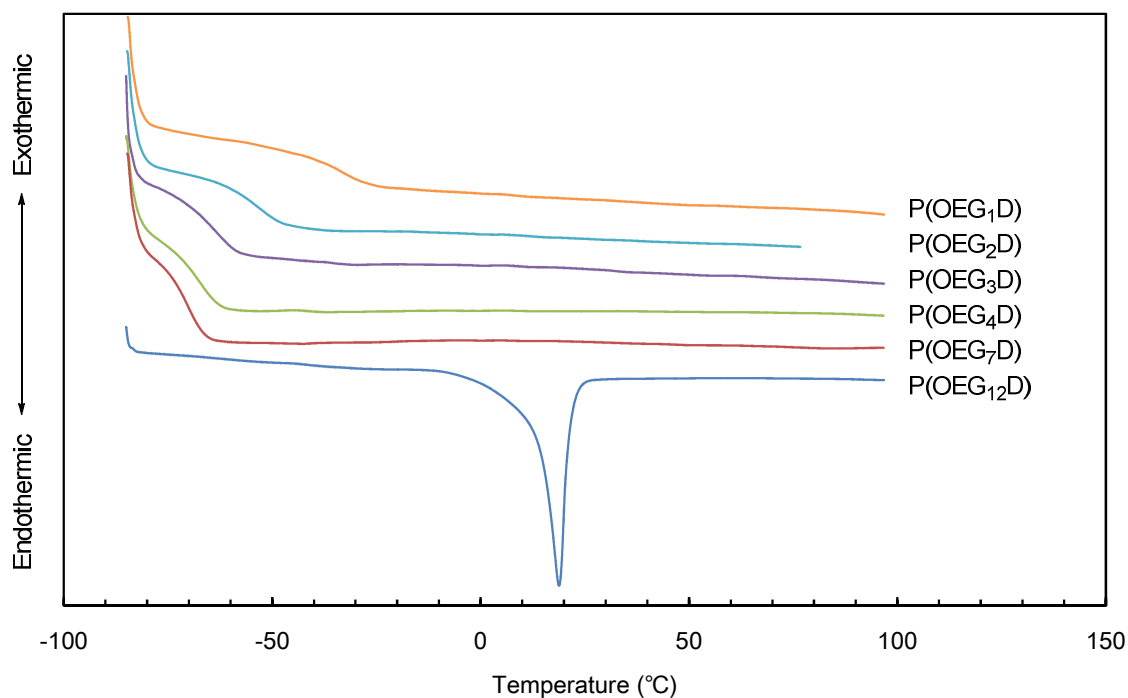

**Figure S9.** DSC curves for P(OEG<sub>x</sub>D) at a heating rate of 10 °C/min [P(OEG<sub>1</sub>D):  $M_n$  = 6500, P(OEG<sub>2</sub>D):  $M_n$  = 8600, P(OEG<sub>3</sub>D):  $M_n$  = 10300, P(OEG<sub>4</sub>D):  $M_n$  = 11100, P(OEG<sub>7</sub>D):  $M_n$  = 16500, P(OEG<sub>12</sub>D):  $M_n$  = 17300].

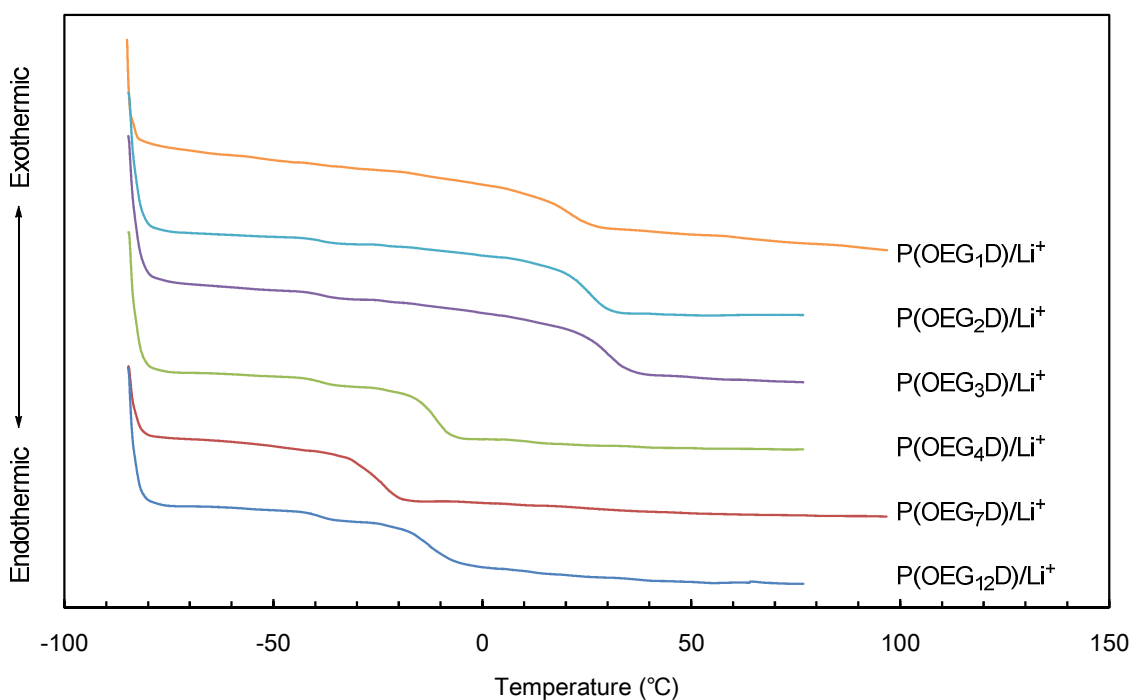

**Figure S10.** DSC curves for P(OEG<sub>x</sub>D)/Li<sup>+</sup> complexes at a heating rate of 10 °C/min [CF<sub>3</sub>SO<sub>3</sub>Li/oxyethylene unit = 0.2. P(OEG<sub>1</sub>D):  $M_n$  = 6500, P(OEG<sub>2</sub>D):  $M_n$  = 8600, P(OEG<sub>3</sub>D):  $M_n$  = 10300, P(OEG<sub>4</sub>D):  $M_n$  = 11100, P(OEG<sub>7</sub>D):  $M_n$  = 16500, P(OEG<sub>12</sub>D):  $M_n$  = 17300].

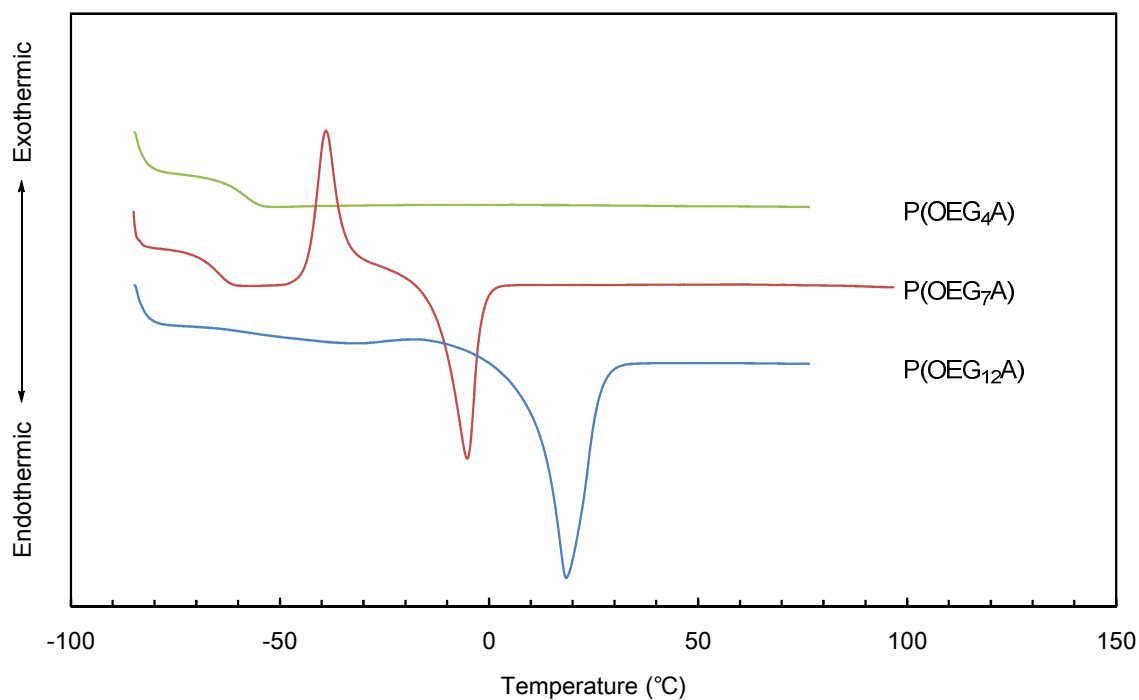

**Figure S11.** DSC curves for P(OEG<sub>x</sub>A) at a heating rate of 10 °C/min [P(OEG<sub>4</sub>A):  $M_n = 11300$ , P(OEG<sub>7</sub>A):  $M_n = 10000$ , P(OEG<sub>12</sub>A):  $M_n = 8100$ ].

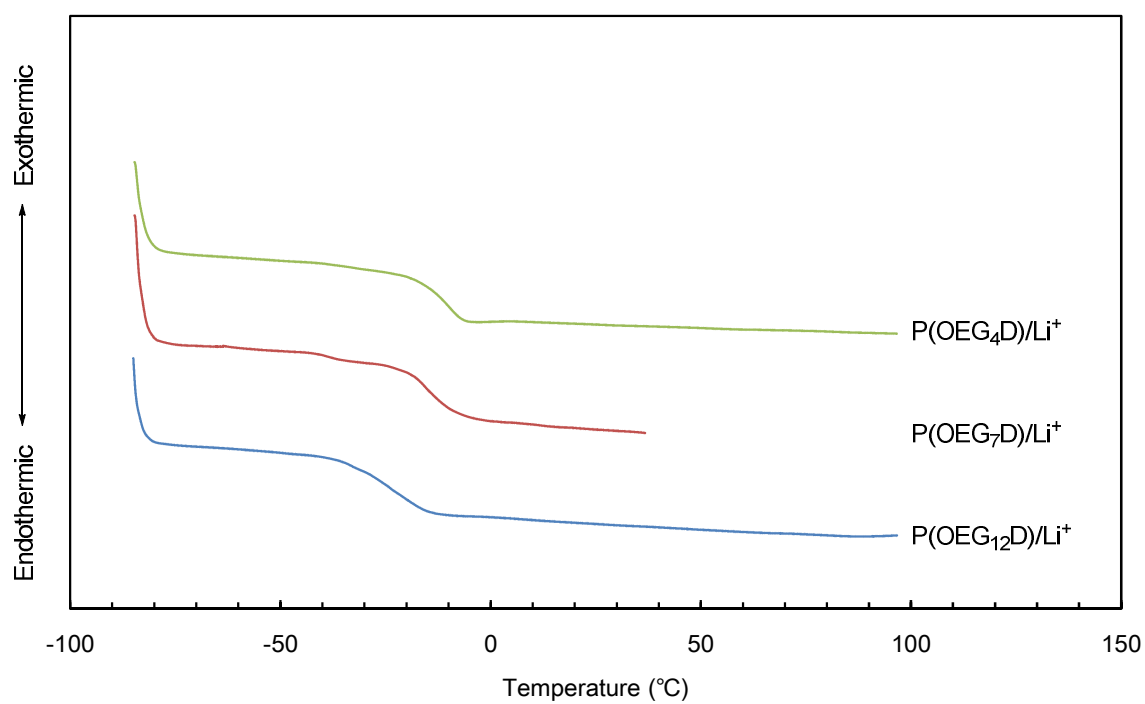

**Figure S12.** DSC curves for P(OEG<sub>x</sub>A)/Li<sup>+</sup> complexes at a heating rate of 10 °C/min [CF<sub>3</sub>SO<sub>3</sub>Li/oxyethylene unit = 0.2, P(OEG<sub>4</sub>A):  $M_n = 11300$ , P(OEG<sub>7</sub>A):  $M_n = 10000$ , P(OEG<sub>12</sub>A):  $M_n = 8100$ ].
